# Supplementary material for: A simple approach towards uniform spherical Ag-like nanoparticles
Source: Royal Society of Chemistry journal article supplement (doi:10.1039/c2nr30532a), 2012-01-01
Supplement: c2nr30532a.pdf [file c2nr30532a.pdf]

Supplementary Material (ESI) for Nanoscale  
This journal is (c) The Royal Society of Chemistry 2012

## A simple approach towards uniform spherical Ag-like nanoparticles

Yuanyuan Ma, and Yongquan Qu\*

Center for Applied Chemical Research, Frontier Institute of Science and Technology, Xi'an Jiaotong University, Xi'an, 710049, China.

\*To whom correspondence should be addressed. E-mail: [yongquan@mail.xjtu.edu.cn](mailto:yongquan@mail.xjtu.edu.cn)

*Synthesis of Gold Nanorods:* The gold nanorods are synthesized by the seed-growth technique. The gold nanoparticle seeds are first prepared by adding 0.6 ml of ice-cold 0.01 M NaBH<sub>4</sub> solution into 10 ml solution with a concentration of 0.5 mM tetrachloroaurate (III) acid (HAuCl<sub>4</sub>) and 0.1 M cetyltrimethylammoniumbromide (CTAB). The solution is kept at 37 °C for 2 h in order to decompose any NaBH<sub>4</sub> residues before using as the seeds for the synthesis of gold nanorods. For a typical gold nanorods synthesis, 0.5 ml of 0.01 M HAuCl<sub>4</sub> is mixed with 4.5 ml of H<sub>2</sub>O and 5 ml of 0.2 M CTAB. 20 μl of 0.04 M AgNO<sub>3</sub> and 70 μl of 0.0788 M ascorbic acid (AA) are added in sequence, resulting in a colorless solution. After adding 12 μl of gold nanoparticle seeds, the solution gradually develops a brown colour, indicating the formation of gold nanorods. The size of Au nanorods could be adjusted by adding amount of gold nanoparticle seeds.
